# Supplementary material
Source: PubMed Central journal article supplement (PMC3103316)
Supplement: supp_M111.218040_supplements.pdf [file supp_M111.218040_supplements.pdf]

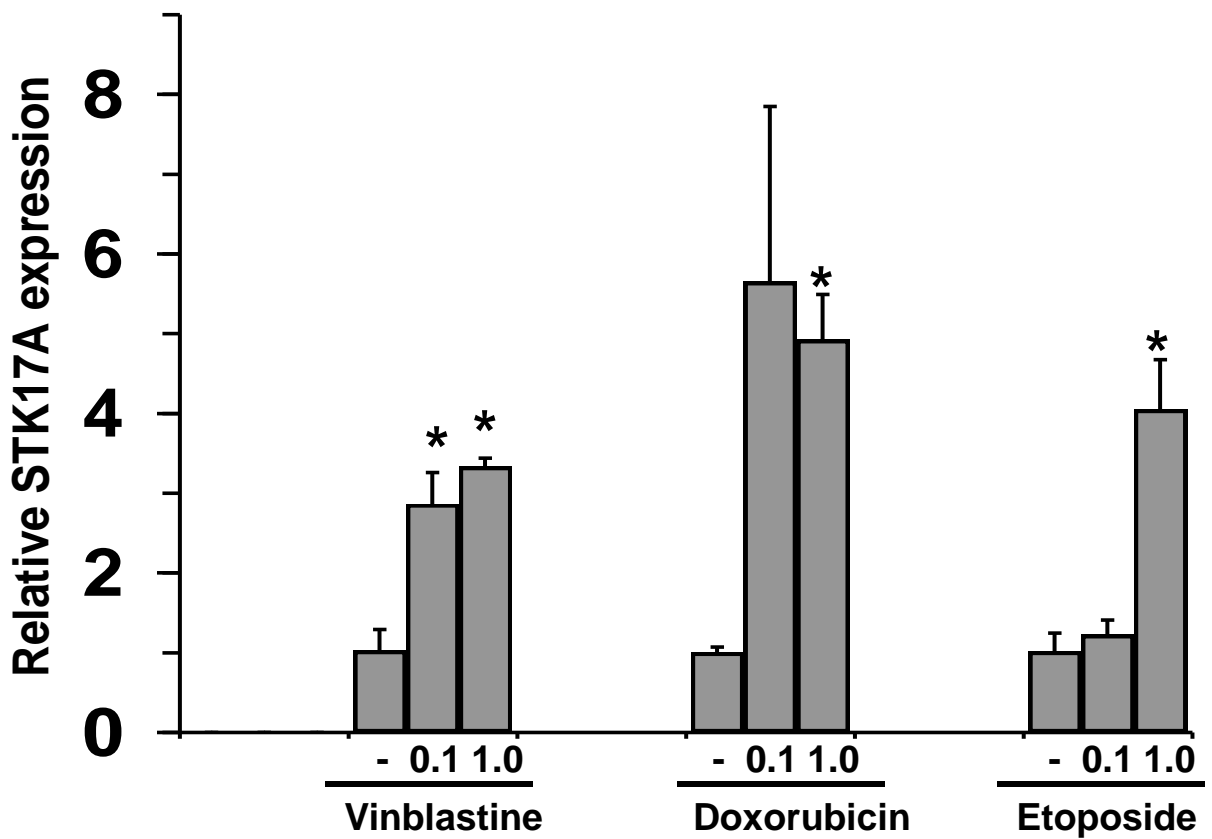

Fig. S1. **STK17A is induced with DNA damaging agents.** Real time PCR analysis of STK17A expression in NT2/D1 cells treated for 6 hours with indicated dosages of vinblastine, doxorubicin or etoposide and assessed for STK17A expression 24 hours later. Error bars are standard deviation. \* =  $p < 0.05$ .

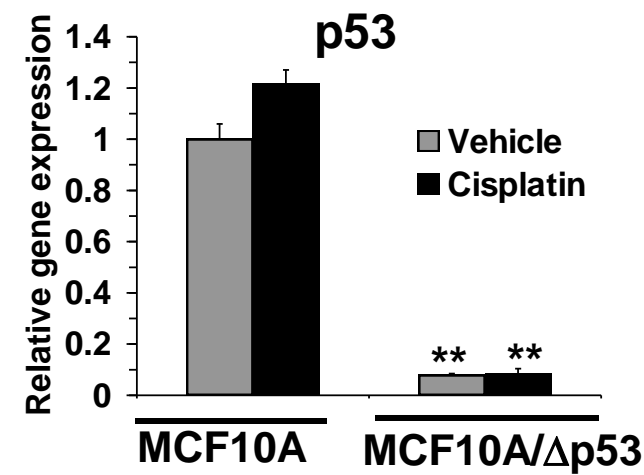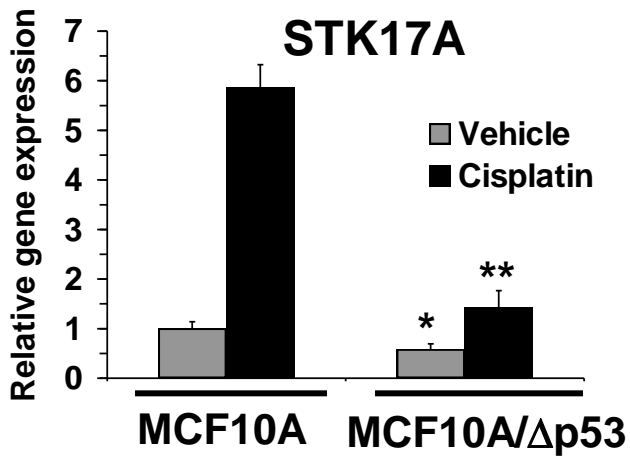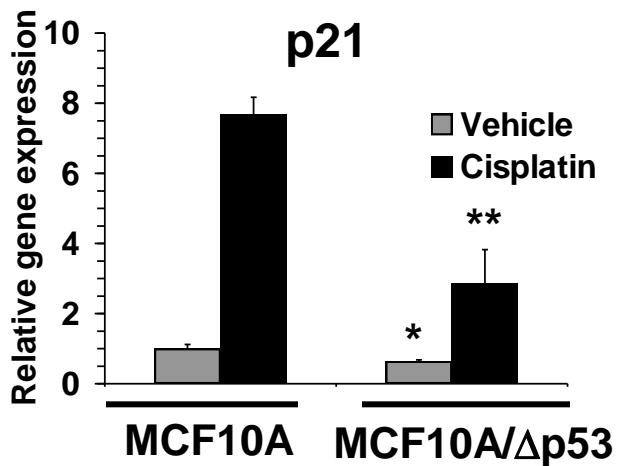

Fig. S2. **STK17A is induced with cisplatin in a p53-dependent manner in MCF10A cells.** Real time PCR analysis of p53 (top), STK17A (middle) and p21 (bottom) expression in MCF10A and MCF10A cells stably expressing an shRNA targeting p53. Error bars are standard deviation. \* =  $p < 0.05$ ; \*\* =  $p < 0.005$ .

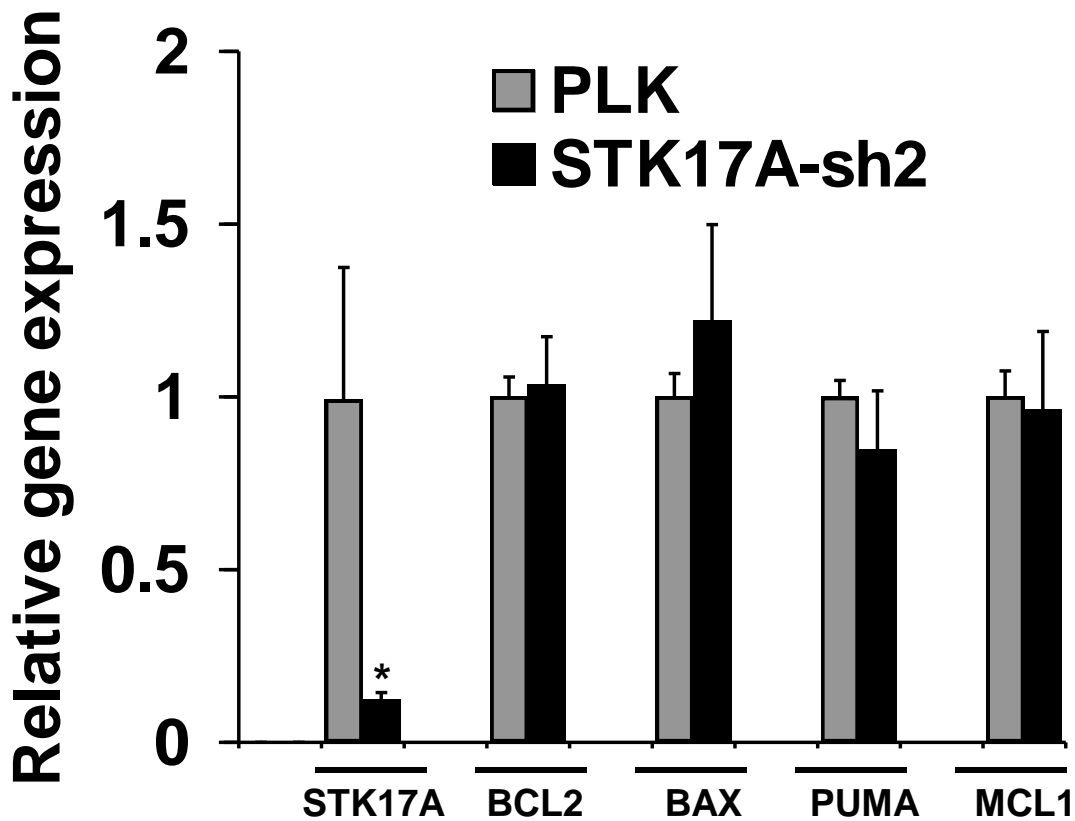

Fig. S3. **STK17A knockdown does not alter expression of BCL2 family members.** Real time PCR analysis of indicted genes in NT2/D1 cells stably transduced with empty (PLK) or STK17A shRNA encoding lentivirus (STK17A-sh2). Error bars are standard deviation. \* =  $p < 0.05$ .

Supplementary Table 1: Primers for qPCR

| Gene              | Forward primer (5'-3')        | Reverse primer (5'-3')     |
|-------------------|-------------------------------|----------------------------|
| <u>Expression</u> |                               |                            |
| human STK17A      | GCTGGGGAGAGCGGGTGT            | CTGGCCGCCTGTCACTCCG        |
| human STK17B      | AAAAATAGGGCATGCGTGTGA         | CATAGTTCAGGATTTCTGGAGCTAAA |
| human p53         | CGGGTCACTGCCATGGA             | GGTCTGAAAATGTTTCTTGACTCA   |
| human p21         | TGGAGACTCTCAGGGTCGAAA         | GGCGTTTGGAGTGGTAGAAATC     |
| human GAPDH       | GATTCCACCCATGGCAAATT          | GATGGTGTGGGATTTCCATTG      |
| human MT1H        | TCCAGTCTCACCTCGGCTTGCA        | CAGGAGCCACCAGCCTCGCA       |
| human MT1M        | TCCGGGTGGGCTAGCAGTC           | AGCCGCGGTAAGGCTGGAGA       |
| human MT1X        | TCATCTGTCCCGTGC               | GCGAGCAGGAGCAGTTGGGG       |
| mouse STK17B      | GCAAGTGAGCTTCGGGAAAT          | GCTGTGGTAATGGGATCATAGTTG   |
| mouse p53         | CCATCTACAAGAAGTCACAGCACAT     | ATCGGAGCAGCGCTCATG         |
| mouse P21         | GATTGCGATGCGCTCATG            | TCTCCGTGACGAAGTCAAAGTTC    |
| mouse GAPDH       | AGGTCCGGTGTGAACGGATTG         | TGTAGACCATGTAGTTGAGGTCA    |
| <u>ChIP</u>       |                               |                            |
| STK17A-p53RE1     | CCCTGCATAAGACACGAATTCC        | AGTGA ACTGGAGGCCACAA       |
| STK17A-p53RE2     | GACTGGTTAAGGCTTGTTACCTTTCT    | TGCCCCAGTAACGAAATCATT      |
| STK17A-p53RE3     | GCCAAGTCTGAGGCTCCATAGA        | CCAGAAGCACTCAACCATGGAT     |
| STK17A-p53RE4/5   | TGAATCTCCTCCAACCAAAAATAGT     | GGGTTTACCTAGATTTATGTCAACA  |
| STK17A-30kb       | GAGAAAAACAAGAAGGAGTACATCGA    | GCCTCGGTCTGCTGTACCA        |
| p21p53RE          | CATGTTGAGCTCTGGCATAGAAGA      | TCCCCTTCCTCACCTGAAAA       |
| PLK2p53RE         | GTGGTATCAACATTAATCGAACATTTACA | TGGCAATAAGCCTCTTTTCCA      |
| GAPDHpromoter     | ACAGGGCCGGGATTGTCT            | GCACGGAAGGTCACGATGT        |
| Desert1           | ACGCCAGCTGCCTTCTTCT           | GCCTCCGCTTGCTGAACT         |
| Desert2           | AAAGCTGGGAAGCCTACACTGA        | CTTAACCCTTCCTTAGGACTTGTCA  |

Supplementary Table 2: Predicted p53 response elements in hSTK17A

| Site   | Position        | Score  | %max   | Sequence                        |
|--------|-----------------|--------|--------|---------------------------------|
| p53RE1 | chr7:43,617,244 | 26.154 | 100.00 | GGGCATGCTC-AGGCAAGTCC           |
| p53RE2 | chr7:43,626,078 | 22.999 | 87.93  | AAGCTTGACT-GGTTA-AGGCTTGTTA     |
| p53RE3 | chr7:43,659,377 | 23.728 | 90.72  | GGACTTGTC-ATG-TGGCATGACT        |
| p53RE4 | chr7:43,662,441 | 23.728 | 90.72  | AGGCATGCAC-CATGACACT-CGGCTAGCTT |
| p53RE5 | chr7:43,664,081 | 23.728 | 90.72  | TAACATGTCT-TAACTGTA-AAACATGTAT  |
